# Supplementary figures and images for: Expanding Individual Placement and Support to Populations With Conditions and Disorders Other Than Serious Mental Illness
Source: Atypon-hosted journal article supplement (doi:10.1176/appi.ps.201800464), 2019-02-28

**ONLINE SUPPLEMENT: Study Flow Diagram**

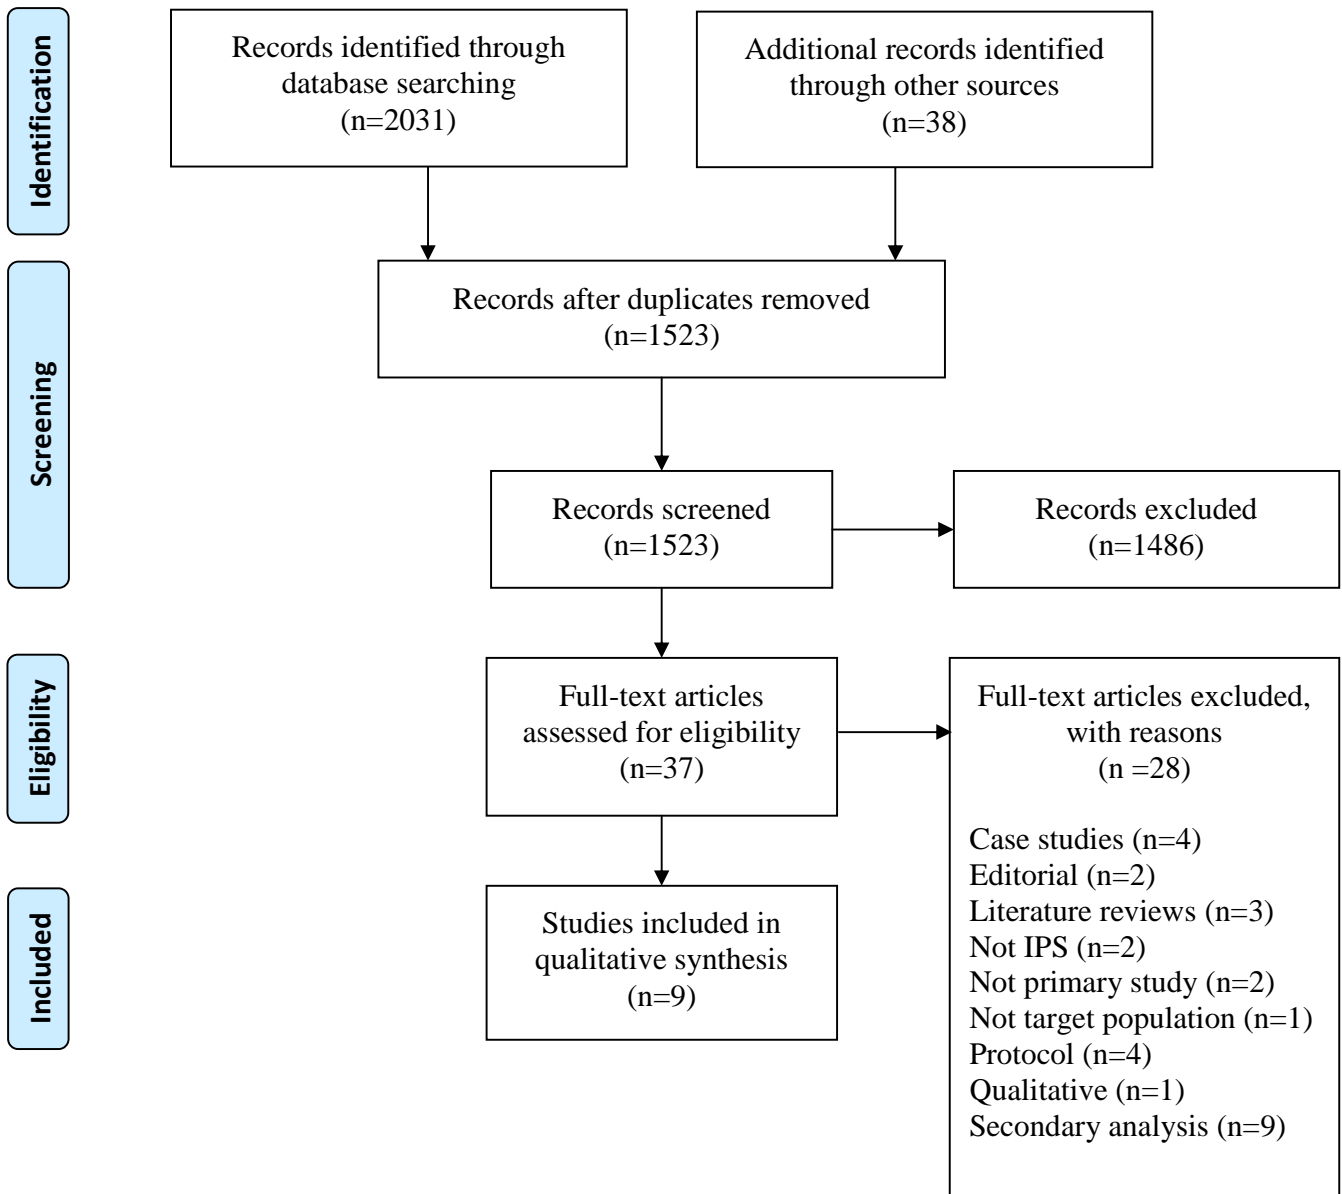

Supplement: appi.ps.201800464.ds001.pdf [file appi.ps.201800464.ds001.pdf]
